# Supplementary material for: Measuring the mechanical properties of flexible crystals using bi-modal atomic force microscopy
Source: Royal Society of Chemistry journal article supplement (doi:10.1039/c9cp04542b), 2019-01-01
Supplement: c9cp04542b1.pdf [file c9cp04542b1.pdf]

## Supplementary Information

### Nano-Indentation

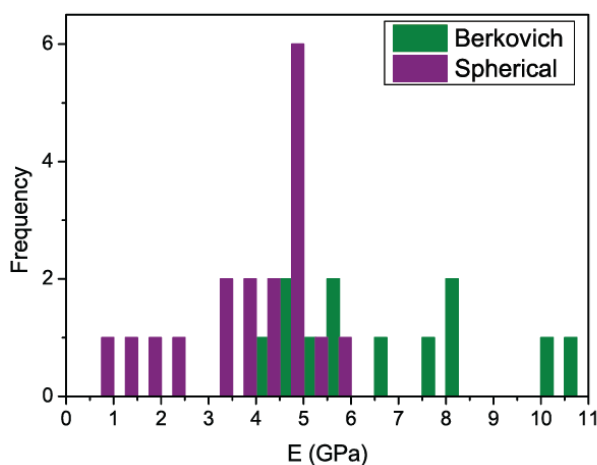

**Figure S1.** Histogram of elastic modulus values ( $E$ ; GPa) measure using nanoindentation using both a Berkovich and a spherical tip.

### Bi-Modal AFM

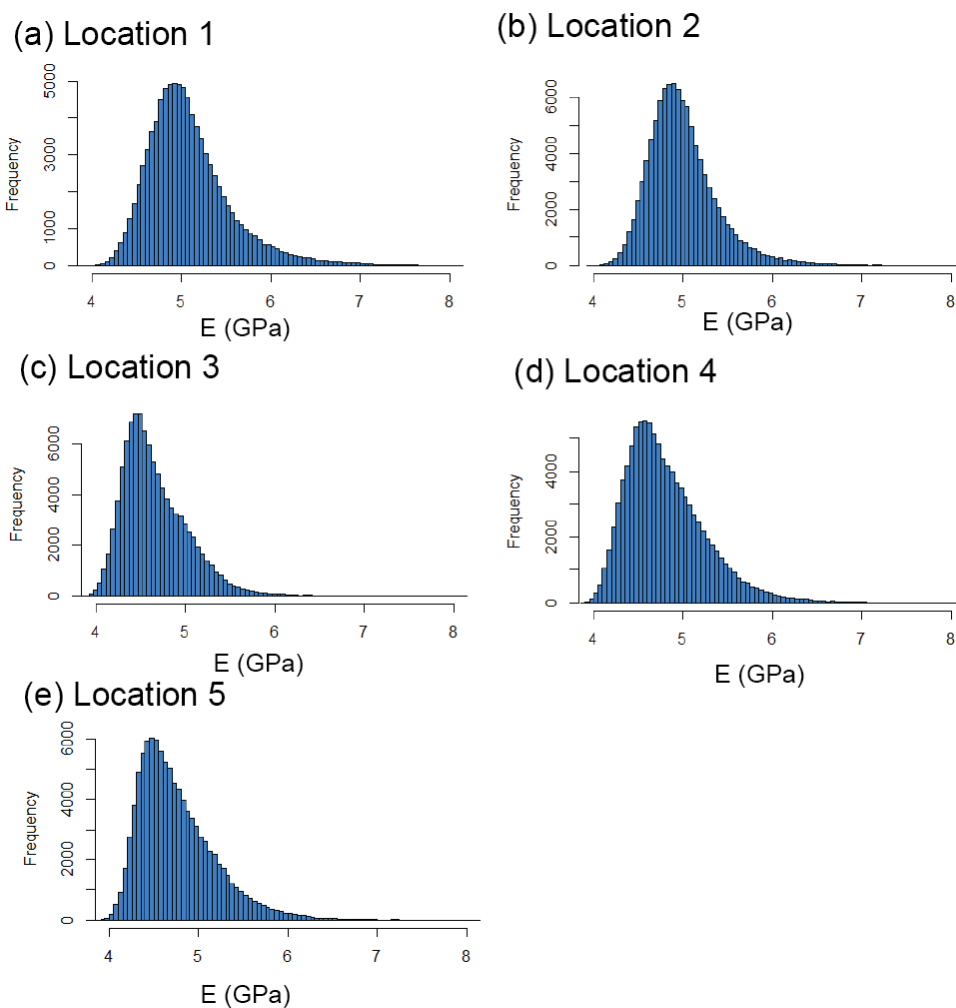

**Figure S2.** Histograms of elastic modulus  $E$  (GPa) values measured at five locations on the face of the  $\text{Cu}(\text{acac})_2$  crystal.

## Additional Calculations

### Imaging Force Calculations:

The maximum average imaging force ( $F_{avg}$ ) used during the AM-AFM experiments could be approximated using the following equations;<sup>1</sup>

$$F_{avg} = k_c A_0 \frac{4\pi^2}{3} \left(\frac{\tau}{T}\right)^2 \quad (2)$$

And:

$$\frac{\tau}{T} = \frac{\arccos\left[\frac{(A_0 - \Delta A)}{A_0}\right]}{2\pi} \quad (3)$$

where,  $A_0$  is the free liquid amplitude ( $\sim 20$  nm),  $\Delta A$  is the change in amplitude upon surface engagement, also referred to as the damped oscillation ( $\sim 4$  nm – 6 nm), and  $K_c$  is the cantilever spring constant (described above).  $T$  and  $\tau$  are the harmonic oscillation period and the sample contact period, respectively. Under these experimental conditions, the max  $F_{avg}$  was consistently maintained between 0.25 nN and 0.38 nN. This gives an imaging force range of 28 – 44 nN (shown in Figure S3).

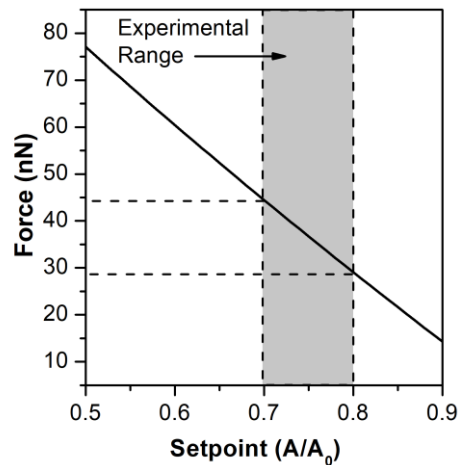

**Figure S3.** Calculated imaging force as a function of  $A/A_0$ . The  $A/A_0$  range used in the experiments here is marked on the graph.

### References

- 1 C. A. J. Putman, K. O. V. d. Werf, B. G. D. Grooth, N. F. V. Hulst and J. Greve, *Applied Physics Letters*, 1994, **64**, 2454-2456
